# Supplementary material
Source: MDPI journal article supplement (https://www.mdpi.com/2071-1050/12/3/890)
Supplement: s1 [file s1]

## Supplementary material

Table S1: Extended table- Novel designs sustainability comparison

|   | Shelter solution (shelter type)                                    | Application                                                                                                                                                                                                               | Transportation                                             | Social sustainability                                                                                                                                                                                   |                                                                                                                                                                                                                                   | Environmental sustainability                                                                                                                       |                                                                                                                                                                                                                                                                           | Economic sustainability |                                                                                 | References                                            | Notes                                                                                                           |
|---|--------------------------------------------------------------------|---------------------------------------------------------------------------------------------------------------------------------------------------------------------------------------------------------------------------|------------------------------------------------------------|---------------------------------------------------------------------------------------------------------------------------------------------------------------------------------------------------------|-----------------------------------------------------------------------------------------------------------------------------------------------------------------------------------------------------------------------------------|----------------------------------------------------------------------------------------------------------------------------------------------------|---------------------------------------------------------------------------------------------------------------------------------------------------------------------------------------------------------------------------------------------------------------------------|-------------------------|---------------------------------------------------------------------------------|-------------------------------------------------------|-----------------------------------------------------------------------------------------------------------------|
|   |                                                                    |                                                                                                                                                                                                                           |                                                            | Pros                                                                                                                                                                                                    | Cons                                                                                                                                                                                                                              | Pros                                                                                                                                               | Cons                                                                                                                                                                                                                                                                      | Pros                    | Cons                                                                            |                                                       |                                                                                                                 |
| 1 | Conrad Gargett's By Conrad Gargett Riddel firm (Emergency shelter) | Only prototyped                                                                                                                                                                                                           | Flat packed- Can be disassembled and reassembled with ease | - Flexibility in positioning the shingles and therefore the openings<br>- No mechanical fixings                                                                                                         | - One room design-<br>- Does not consider social needs as it is a global shelter<br>- No toilet or kitchen provision                                                                                                              | - Frame is made of a grid of intersecting plywood<br>- Some cladding shingles made of plywood                                                      | - Some cladding shingles made of translucent plastic and clear plastic                                                                                                                                                                                                    |                         | Unknown cost                                                                    | (Conrad Gargett, 2018; Furuto, 2013)                  |                                                                                                                 |
| 2 | Exo stackable shelter By Michael McDaniel (Transitional shelter)   | Reaction produced around 50 Exos total, most were for testing purposes.                                                                                                                                                   | Stackable                                                  | - Easily deployed in two minutes by four people<br>- Units can be attached to each other for more space<br>- No tools or heavy machinery needed.                                                        | - Does not consider social needs as it is a global shelter<br>- One room design<br>- No toilet or kitchen provision                                                                                                               | - Use of wood<br>- Some units come with an LED light display for unlocking and locking the door.<br>- Recyclable                                   | - Aircraft-grade aluminium<br>- Flooring is made of heavy-duty steel tubing and Birchwood                                                                                                                                                                                 |                         | Shelter cost \$5,000-\$6,000 (Unaffordable)                                     | (FIBONACCISTONE, 2018; Kessler, 2015; McDaniel, 2017) | closed in April 2016 due to funding issues                                                                      |
| 3 | U-dome (Transitional shelter)                                      | - Two U-Domes were assembled in Sacramento-California<br>- Some shelters were distributed at River Haven transitional shelter community<br>- Some shelters distributed at the Arcata Night Shelter (for homeless persons) | Flat packed                                                | - Easily deployed<br>- Can incorporate local materials                                                                                                                                                  | - Does not consider social needs as it is a global shelter<br>- One room design<br>- Small size (18m <sup>2</sup> ) proposed for a family of five members<br>- No toilet or kitchen provision                                     | - Off-grid energy sources compatible but not included                                                                                              | - 5 mm thick corrugated polypropylene panels connected with nylon fasteners                                                                                                                                                                                               |                         | Basic shelter cost \$2,495- added accessories can be purchased. (Above average) | (designboom, 2018; World Shelters, 2009, 2018b)       | Other shelters have been designed by the same company; World Shelter, such as (TShel2/ Green Dome/ / Q-Shelter) |
| 4 | TranShel (Transitional shelter)                                    | - Produced a shelter for display at the Shelter Consortium meeting in Geneva (May 2009)                                                                                                                                   | Flat packed                                                | - Easily deployed, can be erected by four adults<br>- Expandable, adaptable as a core house using local materials<br>- Panels provide ready attachments exterior and interior for using local materials | - Does not consider social needs as it is a global shelter<br>- One room design<br>- Small size (18m <sup>2</sup> ) and a wall height of 1.8m proposed for a family of five members<br>- No toilet or kitchen provision           | - Reusable<br>- Material has no off-gassing<br>- Recyclable<br>- Possibility of adding local materials                                             | - Frameless hard-panel structures of panels made from corrugated polypropylene                                                                                                                                                                                            |                         | Shelter cost \$2,965-\$2,360 (Above average)                                    | (World shelters, 2018; World Shelters, 2018a)         |                                                                                                                 |
| 5 | Concrete Canvas shelter (Transitional shelter)                     | - Most projects were military shelters and were sent for tests (US military, Swedish military, Dutch military and United Arab Emirates military)                                                                          | Foldable and inflatable                                    | - Has two sizes to meet various family's needs (25m <sup>2</sup> or 50m <sup>2</sup> )<br>- Easily deployed, ready in 24 hours                                                                          | - Does not consider social needs as it is a global shelter<br>- One room design<br>- No toilet or kitchen provision                                                                                                               | - Durable- design life of over 10 years<br>- Covered by sand or earth fill, which will give protection, thermal mass and insulation.               | - Thin walled concrete structures which also means that it requires water for construction<br>- Plastic inner<br>- The 50m <sup>2</sup> shelter needs a vehicle or winch to aid with unfolding the shelter prior to inflation<br>- It must be demolished for its end life | - Use of Nylon          | Shelter cost \$23,000 to \$30,000 (Unaffordable)                                | (Concrete Canvas, 2018a, 2018b; Howard, 2013)         | Medium to long-term operations                                                                                  |
| 6 | The Liina Transitional Modular Shelter (Transitional shelter)      | Was only prototyped for experiment                                                                                                                                                                                        | Flat packed                                                | - Easily deployed- Can be assembled in six hours by two adults<br>- The interior is divided into different spaces<br>- A private kitchen is provided                                                    | - The space subdivision is not responding to the cultural needs (Designed for Ararat region in Turkey but considered as a global shelter)<br>- Small size (18m <sup>2</sup> ) for a family of 4-5people<br>- No toilet provisions | - Built of plywood and laminated veneer lumber panels<br>- Durable- lifespan of around 5 years<br>- Wood fibre insulation<br>- Covered by a canopy | - Nylon straps (liina) are used                                                                                                                                                                                                                                           |                         | Unknown cost                                                                    | (Archdaily, 2018; Meinhold, 2011)                     |                                                                                                                 |

|    | Shelter solution (shelter type)                        | Application                                                                                                                                                                                                                                                                                                        | Transportation        | Social sustainability                                                                                                                                                                                                                                                    |                                                                                                                                                                                                                                                                                                                                                  | Environmental sustainability                                                                                                                                                                                                                                                |                                                                                                                                                                                                                                                                                                             | Economic sustainability                                                                        |                                                  | References                                                                                       | Notes |
|----|--------------------------------------------------------|--------------------------------------------------------------------------------------------------------------------------------------------------------------------------------------------------------------------------------------------------------------------------------------------------------------------|-----------------------|--------------------------------------------------------------------------------------------------------------------------------------------------------------------------------------------------------------------------------------------------------------------------|--------------------------------------------------------------------------------------------------------------------------------------------------------------------------------------------------------------------------------------------------------------------------------------------------------------------------------------------------|-----------------------------------------------------------------------------------------------------------------------------------------------------------------------------------------------------------------------------------------------------------------------------|-------------------------------------------------------------------------------------------------------------------------------------------------------------------------------------------------------------------------------------------------------------------------------------------------------------|------------------------------------------------------------------------------------------------|--------------------------------------------------|--------------------------------------------------------------------------------------------------|-------|
|    |                                                        |                                                                                                                                                                                                                                                                                                                    |                       | Pros                                                                                                                                                                                                                                                                     | Cons                                                                                                                                                                                                                                                                                                                                             | Pros                                                                                                                                                                                                                                                                        | Cons                                                                                                                                                                                                                                                                                                        | Pros                                                                                           | Cons                                             |                                                                                                  |       |
| 7  | The Pallet House (Transitional shelter)                | Some prototypes were built for various exhibitions                                                                                                                                                                                                                                                                 | Could be disassembled | <ul style="list-style-type: none"> <li>- Easily deployed</li> <li>- No skilled workers needed</li> <li>- Adaptable</li> <li>- Possibility of adding local materials as cladding</li> </ul>                                                                               | <ul style="list-style-type: none"> <li>- Not fully completed with the pallets, so it depends on the availability of materials in the location.</li> <li>- The basic unit is small (18m<sup>2</sup>) and requires 80 pallets</li> <li>- No toilet or kitchen provision, but it can be added as it is more of a technique than a design</li> </ul> | <ul style="list-style-type: none"> <li>- Made of wooden shipping pallets covered by local materials using wattle &amp; daub technique</li> <li>- Wood or straw roof (p)</li> <li>- Possibility of LM</li> </ul>                                                             | <ul style="list-style-type: none"> <li>- An option of using corrugated sheets as a roof cover</li> </ul>                                                                                                                                                                                                    | Materials cost around \$500- pallets only (for a shelter of 18m <sup>2</sup> ) (Below average) |                                                  | (I-BEAM, 2018)                                                                                   |       |
| 8  | Life shelter (Transitional shelter)                    | Hundreds of Syrian refugees has been living in the shelters (Northern Iraq)                                                                                                                                                                                                                                        | Flat packed           | <ul style="list-style-type: none"> <li>- Easily deployed- Can be assembled by 2 people in 3-4 hours without tools</li> <li>- Adaptable as it is a modular design</li> <li>- Can integrate local materials</li> <li>- Durable- expected life span of 15+ years</li> </ul> | <ul style="list-style-type: none"> <li>- Does not consider social needs as it is a global shelter</li> <li>- One room design</li> <li>- Small size (18m<sup>2</sup>)</li> <li>- No toilet or kitchen provision</li> </ul>                                                                                                                        | <ul style="list-style-type: none"> <li>- Stone wool insulation</li> <li>- Durable- Has a life span of 15+ years.</li> <li>- Reusable for permanent housing</li> </ul>                                                                                                       | <ul style="list-style-type: none"> <li>- Panels and end-walls made of Stone wool insulation boards reinforced with steel</li> <li>- Galvanised steel floor frame</li> <li>- Cement cladding roof</li> </ul>                                                                                                 | For large quantities order, the price start from \$790- excluding taxes (Below average)        |                                                  | (Lifeshelter, 2018; Real Relief, 2018)                                                           |       |
| 9  | Rapid Deployment Module (RDM) (Semi-permanent shelter) | <ul style="list-style-type: none"> <li>- Used few times as medical facilities and other functions.</li> <li>- 26 shelters were bought from BP for their work in Mexico</li> <li>- Multiple shelters were provided to Moore Oklahoma</li> <li>- There were trials to distribute them as refugee shelters</li> </ul> | Flat packed           | <ul style="list-style-type: none"> <li>- Easily deployed- Can be assembled by 2 people in 25 minutes</li> <li>- Integrated floor structure that makes the shelter sets slightly off the ground</li> </ul>                                                                | <ul style="list-style-type: none"> <li>- Does not consider social needs as it is a global shelter</li> <li>- One room design</li> <li>- Small size (12m<sup>2</sup>)</li> <li>- No toilet or kitchen provision (although some shelters had an addition of toilet and shower)</li> </ul>                                                          | <ul style="list-style-type: none"> <li>- Lightweight roof is vented, and the shade fly provides passive-cooling and heating.</li> <li>- Reuse shipping box as the base structure</li> <li>- Durable- Expected lifespan of 10 years</li> </ul>                               | <ul style="list-style-type: none"> <li>- Materials used for walls are not mentioned- only that they are hard walls and could double up as white boards.</li> <li>- The roof is made from vented fabric roof and its weather protective level is questioned despite the weather-protection claims</li> </ul> | Shelter cost \$15,000-\$18,000 (Unaffordable)                                                  | (Maxey, 2013; VisibleGood, 2018; Williams, 2013) | Although the inventors call it semi-permanent shelters, it looks more as a transitional shelter. |       |
| 10 | Tentative Concept (Post-disaster shelter)              | Not known application                                                                                                                                                                                                                                                                                              | Flat packed           | <ul style="list-style-type: none"> <li>- Has a floor that is raised above the floor</li> </ul>                                                                                                                                                                           | <ul style="list-style-type: none"> <li>- Small size (8m<sup>2</sup>)- Can hosts two adult and two children (very tight area per person)</li> <li>- No toilet or kitchen provision</li> </ul>                                                                                                                                                     | <ul style="list-style-type: none"> <li>- Use of fibreglass shells</li> <li>- Use of textile that is quilted and contains insulated perlite in between</li> <li>- Collects water on the roof</li> <li>- Recyclable decks floor</li> </ul>                                    | <ul style="list-style-type: none"> <li>- Tough fabric walls are not enough to maintain a thermal comfort.</li> <li>- The textile is quilted and contains insulated perlite in between</li> </ul>                                                                                                            | Unknown cost                                                                                   | (DESIGNNOBIS, 2018; Treggiden, 2015)             | Though the perlite is a natural material, it is a possible cause of rhinitis and pneumonia       |       |
| 11 | Hex house (Shelter (not specified))                    | Prototyped- But no known application                                                                                                                                                                                                                                                                               | Flat packed           | <ul style="list-style-type: none"> <li>- Sufficient size (47m<sup>2</sup>)</li> <li>- Various rooms</li> <li>- Private toilet and kitchen provision</li> </ul>                                                                                                           | <ul style="list-style-type: none"> <li>- Does not consider social needs as it is a global shelter (the porch and openings locations may interfere with the privacy requirements of some cultures).</li> </ul>                                                                                                                                    | <ul style="list-style-type: none"> <li>- Durable- Has a life span of 15y-20y</li> <li>- It includes rainwater harvesting systems.</li> <li>- Includes underground water storage tanks</li> <li>- Includes rooftop solar panels</li> <li>- Use of foam insulation</li> </ul> | <ul style="list-style-type: none"> <li>- Use of steel SIPs</li> </ul>                                                                                                                                                                                                                                       | Shelter cost \$15,000-\$20,000 and on a different source \$55,000-\$60,000 (Unaffordable)      | (Hex House, 2018; McKnight, 2016)                |                                                                                                  |       |
| 12 | Weaving a home (Tent)                                  | Not applied                                                                                                                                                                                                                                                                                                        | Foldable              | <ul style="list-style-type: none"> <li>- Culturally acceptable as it is inspired by the Bedouin tents</li> </ul>                                                                                                                                                         | <ul style="list-style-type: none"> <li>- Short-term solution- It can only replace the rapid used tent but not a longer-term shelter solution.</li> <li>- No toilet or kitchen provision</li> </ul>                                                                                                                                               | <ul style="list-style-type: none"> <li>- Solar-powered skin that absorbs sunlight, convert it into usable electricity and store it in a battery kept underneath the tent.</li> <li>- Roofs are equipped with a water storage tank.</li> </ul>                               | <ul style="list-style-type: none"> <li>- Plastic members threaded into a cloth</li> </ul>                                                                                                                                                                                                                   | Unknown cost                                                                                   |                                                  |                                                                                                  |       |

Table S2: Extended table- Existing solutions sustainability comparison

|   | Shelter solution (Shelter type)             | Application                                                      | Transportation                  | Social sustainability                                                                                                                                                                                           |                                                                                                                                                                                                                | Environmental sustainability                                                                                                                                                                                               |                                                                                                                                                                                                                                         | Economic sustainability                                                                                                                                                                                                                          |                                                                                                                                                                                         | Notes                                                                                                                                                                                                                                        | References                          |
|---|---------------------------------------------|------------------------------------------------------------------|---------------------------------|-----------------------------------------------------------------------------------------------------------------------------------------------------------------------------------------------------------------|----------------------------------------------------------------------------------------------------------------------------------------------------------------------------------------------------------------|----------------------------------------------------------------------------------------------------------------------------------------------------------------------------------------------------------------------------|-----------------------------------------------------------------------------------------------------------------------------------------------------------------------------------------------------------------------------------------|--------------------------------------------------------------------------------------------------------------------------------------------------------------------------------------------------------------------------------------------------|-----------------------------------------------------------------------------------------------------------------------------------------------------------------------------------------|----------------------------------------------------------------------------------------------------------------------------------------------------------------------------------------------------------------------------------------------|-------------------------------------|
|   |                                             |                                                                  |                                 | Pros                                                                                                                                                                                                            | Cons                                                                                                                                                                                                           | Pros                                                                                                                                                                                                                       | Cons                                                                                                                                                                                                                                    | Pros                                                                                                                                                                                                                                             | Cons                                                                                                                                                                                    |                                                                                                                                                                                                                                              |                                     |
| 1 | Refugee Housing Unit (Transitional shelter) | 15,000 shelter bought by UNHCR where only 5000 were distributed. | Flat packed                     | - Easily deployed-can be erected by four people in four hours<br>- Moveable                                                                                                                                     | - Does not consider the specific social needs as it is a global shelter<br>- One room shelter<br>- Small size (17.5m <sup>2</sup> ) which is not enough for many cultures.<br>- No toilet or kitchen provision | - Small roof-based solar panel                                                                                                                                                                                             | - Short lifespan- up to three years with maintenance<br>- The frame consists of lightweight galvanised steel pipes<br>- Polyolefin foam roof and wall panels<br>- Plastic screws, bolts and brackets                                    | - The cost is around \$1250 (Below average)                                                                                                                                                                                                      |                                                                                                                                                                                         | - Concerns regarding vulnerability to fire<br>- Issues with the internal metal-tube frame, ventilation and rigidity<br>- No groundsheet<br>- Not accessible to wheelchair (raised door)<br>- A new version of the shelter is being designed. | (Better shelter, 2018; Fairs, 2017) |
| 2 | Bangladesh 2007 (Core shelter)              | 1250 shelter                                                     | Not transportable               | - Expandable<br>- Locally sourced woven bamboo                                                                                                                                                                  | - Small size (15m <sup>2</sup> ) due to limited land availability<br>- The provision of toilet and kitchen is unknown.                                                                                         | - Wind protection (used cyclone resistance techniques)<br>- Built over a mud plinth for flooding protection<br>- Walls from locally sourced woven bamboo<br>- Beneficiaries self-built the shelters                        | - Permanent base of bricks over the plinth<br>- Corrugated sheets roof<br>- Concrete foundation                                                                                                                                         |                                                                                                                                                                                                                                                  | - Material costs \$1600 (Above average)                                                                                                                                                 |                                                                                                                                                                                                                                              | (UN-HABITAT & IFRC, 2010)           |
| 3 | Kenya- Dadaab 2009 (Core shelter)           | Up to 3,500 shelter per annum                                    | Not transportable               | - Culturally acceptable<br>- Larger space than previously distributed Tukul tents<br>- Women participated in block-making and construction                                                                      | - Small size (18m <sup>2</sup> )<br>- The provision of kitchen is unknown.<br>- A separate space for building toilets is provided                                                                              | - Use of traditional materials<br>- Mud blocks made by beneficiaries<br>- More durable than Tukul tents<br>- Use of timber<br>- Larger pillars and widened foundations made out of mud blocks for better flood resistance. | - Corrugated iron sheets roofing<br>- Mud and water availability limited the project<br>- Unplanned mud excavation resulted in holes often becoming refuse pits, or mosquito-breeding<br>- Sustainable timber sources were hard to find | - Material costs \$480 (Below average)                                                                                                                                                                                                           | - The local available material were limited and therefore the transportation cost per-unit was raised                                                                                   |                                                                                                                                                                                                                                              | (UN-HABITAT & IFRC, 2010)           |
| 4 | Haiti 2010 (T-shelter)                      | 1050 shelter                                                     | Not transportable               | - Sufficient size (27m <sup>2</sup> )<br>- Outdoor porch<br>- Traditional techniques- Clissage (woven slats of wood)<br>- Users were able to modify the shelter<br>- Accessible by people with reduced mobility | - Internationally procured materials<br>- The provision of toilet and kitchen is unknown (not included in the plan)                                                                                            | - Traditional materials<br>- Timber frame<br>- Passive cooling as uncovered clissage allow good ventilation<br>- Mud or mortar can be added to walls<br>- Durable (3y-5y)<br>- Roof of wood and corrugated bituminous      | - Concrete floor supported by masonry wall<br>- Corrugated bitumen roofing                                                                                                                                                              | - Material costs 1650CHF- equals \$1680 (by Sep,2018) (Above average)                                                                                                                                                                            | - The weight and brittle properties of the wall most likely will not perform well in a severe earthquake or under high winds.                                                           |                                                                                                                                                                                                                                              | (IFRC, 2013)                        |
| 5 | Philippines 2011 (Transitional shelter)     | 1823 shelter                                                     | Could be partially disassembled | - Traditional techniques- Amakan- (woven bamboo or palm leaves)<br>- Easily deployed in five days by five people<br>- Locally sourced materials                                                                 | - Small size (17.8m <sup>2</sup> )<br>- The provision of toilet and kitchen is unknown                                                                                                                         | - Durable (5y)<br>- Framed with coconut wood beams and joists for roof and floor<br>- Plywood floor<br>- Locally sourced materials                                                                                         | - Corrugated metal roof<br>- Concrete foundation                                                                                                                                                                                        | - Materials cost 500CHF- equals \$509 (by Sep 2018) (Below average)                                                                                                                                                                              | - Damage should be expected during strong storms.<br>- In order to resist fungal and insect attack, treatment has to be done to coconut wood and plywood as they are not rot resistant. |                                                                                                                                                                                                                                              | (IFRC, 2013)                        |
| 6 | Ethiopia 2011 (Semi-permanent shelter)      | 2175 shelter                                                     | Not transportable               | - There are three shelters' sizes (10m <sup>2</sup> , 14m <sup>2</sup> and 21m <sup>2</sup> ) for various family needs<br>- Built by refugees<br>- Local materials<br>- Separate private toilet                 | - The design (Tukul) is the one used by the host community not the refugees.<br>- No planned spaces for the livestock that were brought by the refugees<br>- The provision of kitchen is unknown               | - Followed local cooling and heating techniques<br>- Constructed with locally procured materials such as bamboo, grass, rope and mud                                                                                       | - Difficulties in sourcing and transporting mud for plastering the walls.<br>- Grass for thatching the roof and for strengthening the mud walls is seasonal                                                                             | - Material costs are (\$640, \$800, \$920) for the (10m <sup>2</sup> , 14m <sup>2</sup> and 21m <sup>2</sup> ) respectively (Below average)<br>- Locally procured materials reduced the transport costs and injected cash into the local economy |                                                                                                                                                                                         |                                                                                                                                                                                                                                              | (IFRC, UN-HABITAT, & UNHCR, 2013)   |

|    | Shelter solution (Shelter type)         | Application                   | Transportation                                      | Social sustainability                                                                                                                                                        |                                                                                                                                                                                                                                                                                             | Environmental sustainability                                                                                                                                                    |                                                                                                                                                                                                                                                             | Economic sustainability                                                                                                                                                          |                                                                                                                                         | Notes | References                                                        |
|----|-----------------------------------------|-------------------------------|-----------------------------------------------------|------------------------------------------------------------------------------------------------------------------------------------------------------------------------------|---------------------------------------------------------------------------------------------------------------------------------------------------------------------------------------------------------------------------------------------------------------------------------------------|---------------------------------------------------------------------------------------------------------------------------------------------------------------------------------|-------------------------------------------------------------------------------------------------------------------------------------------------------------------------------------------------------------------------------------------------------------|----------------------------------------------------------------------------------------------------------------------------------------------------------------------------------|-----------------------------------------------------------------------------------------------------------------------------------------|-------|-------------------------------------------------------------------|
|    |                                         |                               |                                                     | Pros                                                                                                                                                                         | Cons                                                                                                                                                                                                                                                                                        | Pros                                                                                                                                                                            | Cons                                                                                                                                                                                                                                                        | Pros                                                                                                                                                                             | Cons                                                                                                                                    |       |                                                                   |
| 7  | Madagascar 2012 (Progressive shelter)   | 598 shelter                   | Not transportable                                   | - Culturally acceptable as the shelter is an adaptation of the traditional houses in Madagascar.<br>- Use of local materials                                                 | - Small size (12m <sup>2</sup> )<br>- The budgetary constraints resulted in smaller shelter size compared to household size<br>- The provision of toilet and kitchen is unknown                                                                                                             | - Wooden frame<br>- Thatch roof was one of the two roofs options<br>- Use of local materials                                                                                    | - Not enough consideration was given to other local materials such as bamboo.<br>- Corrugated iron roof was one of the two roofs options                                                                                                                    | - Material costs \$128 (Below average)<br>- Project cost per shelter \$250                                                                                                       |                                                                                                                                         |       | (IFRC et al., 2013)                                               |
| 8  | Fiji 2012 (Transitional shelter)        | 254 shelter                   | Able to be disassembled                             | - Sufficient size (21m <sup>2</sup> )                                                                                                                                        | - The provision of toilet and kitchen is unknown (through images probably they are not included)                                                                                                                                                                                            | - Panels, stairs, doors and windows were prefabricated on site<br>- The structural frame was designed to withstand severe cyclonic wind loads<br>- Raised compacted earth floor | - No rigid wall linings were permitted, so plastic sheeting was used instead.<br>- Corrugated iron sheets roof                                                                                                                                              | - Material costs \$1800 (Above average)<br>- Project cost per shelter \$2,900<br>- The remote location increased the total cost as timber was imported                           | - The shelter could not be classified as a safe refuge, though they were designed to withstand the wind load of a Category Four cyclone |       | (IFRC, UN-HABITAT, & UNHCR, 2014)                                 |
| 9  | Myanmar 2012 (Temporary shelter)        | 2843 shelter (8-unit shelter) | Not transportable                                   | - Shelters used locally available materials                                                                                                                                  | - Small size per household (15.6m <sup>2</sup> ) while the whole shelter size is (124.7m <sup>2</sup> )<br>- Eight families live in one shelter<br>- Does not consider cultural needs for women to bath and cook within their shelters.<br>- The provision of toilet and kitchen is unknown | - Shelters used locally available materials                                                                                                                                     | - In a certain time, bamboo was not in season and the project was forced to use lower-quality materials.                                                                                                                                                    | - Material costs \$600 per room/household (Below average) while the material costs of the whole shelter is \$4,800<br>- Project cost per room/household \$88 (\$700 per shelter) |                                                                                                                                         |       | (IFRC et al., 2014)                                               |
| 10 | Philippines 2012 (Transitional shelter) | 4139 shelter                  | Not transportable                                   | - Two shelter sizes (18 m <sup>2</sup> and 24m <sup>2</sup> ) which meets various family sizes.<br>- Local materials<br>- Built in 3-5 days<br>- Separate toilet is provided | - Small size as the 18m <sup>2</sup> shelter is for six people and the 24m <sup>2</sup> is for seven people and more<br>- The provision of kitchen is unknown                                                                                                                               | - Families were supported to use salvaged materials<br>- Used fallen coconut trees for construction                                                                             | - Salvageable materials were less available than needed                                                                                                                                                                                                     | - Material costs \$380 (Below average) - Project cost is \$580                                                                                                                   |                                                                                                                                         |       | (IFRC et al., 2014)                                               |
| 11 | Jordan 2013 (T-shelter)                 | 13,500 shelter                | Not transportable (Although the original design is) | - Easily deployed- Built in 12-16 hours by four people                                                                                                                       | - Does not consider social needs as windows overlook public areas, no porch (cancelled from the design)<br>- Has one room design<br>- Small size compared to the needs (24m <sup>2</sup> for six people)<br>- No provision of private toilet and kitchen                                    | - Use of foam insulation                                                                                                                                                        | - Short lifespan (2y-4y), the users still live in them (5 years till today)<br>- Made of interlocking steel structures<br>- Covered with a double layer of Inverted Box Rib, It was hard to seal off against dust, wind and rain<br>- Heat gain is an issue | - Material costs \$1,270-\$1,410 (Above average)<br>- Total cost per shelter \$2,330 or in another source \$3,442                                                                |                                                                                                                                         |       | (Alshawwreh, Smith, & Wood, 2017; IFRC et al., 2014; UNHCR, 2016) |
| 12 | Iraq 2015-2016 (Transitional shelter)   | 1406 shelter                  | Not transportable                                   | - Locally procured materials that were originally imported<br>- Divided interior<br>- Provision of private toilet and kitchen                                                | - Small size (22.5m <sup>2</sup> )- due to cultural reasons, families complained about the size<br>- Uniformly designed which limited the household needs to be better addressed                                                                                                            | - Plywood sheets for floor covering<br>- Fibre-glass sheet for bathroom floor<br>- PU insulation<br>- Durable                                                                   | - Steel structure<br>- PU insulated sandwich panel for wall coverings                                                                                                                                                                                       | - Material costs \$5,500 (Within existing range)<br>- Project cost per household \$9,621                                                                                         |                                                                                                                                         |       | (Global Shelter Cluster, 2017)                                    |

## References

- Alshawawreh, L., Smith, R. S., & Wood, J. B. (2017). Assessing the sheltering response in the Middle East: Studying Syrian camps in Jordan. *International Journal of Humanities and Social Sciences*, 11(8), 2016–2022. Retrieved from <https://waset.org/publications/10007596/assessing-the-sheltering-response-in-the-middle-east-studying-syrian-camps-in-jordan->
- Archdaily. (2018). Liina Transitional Shelter/ Aalto University Wood Program. Retrieved from <https://www.archdaily.com/174909/liina-transitional-shelter-aalto-university-wood-program>
- Better shelter. (2018). Better Shelter. Retrieved December 13, 2018, from <http://bettershelter.org/>
- Concrete Canvas. (2018a). Concrete Canvas. Retrieved November 26, 2018, from <https://www.concretecanvas.com/cc-shelters>
- Concrete Canvas. (2018b). Concrete canvas shelters.
- Conrad Gargett. (2018). Emergency Shelter | Conrad Gargett. Retrieved December 14, 2018, from <http://www.conradgargett.com.au/project/emergency-shelter/>
- designboom. (2018). world shelters: U dome. Retrieved November 30, 2018, from <https://www.designboom.com/architecture/world-shelters-u-dome/>
- DESIGNNOBIS. (2018). Tentative. Retrieved December 16, 2018, from <http://designnobis.com/index.php?r=site/product&id=191>
- Fairs, M. (2017). Ten thousand IKEA refugee shelters left unused over fire fears, United Nations admits. Retrieved December 13, 2018, from <https://www.dezeen.com/2017/04/29/united-nations-admits-10000-ikea-better-shelter-refugees-mothballed-fire-fears/>
- FIBONACCISTONE. (2018). EXO Housing Shelter - stackable emergency housing from Reaction Housing - Fibonacci Stone. Retrieved December 14, 2018, from <http://www.fibonaccistone.com.au/exo-shelter-stackable-emergency-reaction-housing/>
- Furuto, A. (2013). Emergency Shelter Winning Design / Nic Gonsalves + Nic Martoo. Retrieved December 14, 2018, from <https://www.archdaily.com/385002/emergency-shelter-winning-design-nic-gonsalves-nic-martoo>
- Global Shelter Cluster. (2017). *Shelter projects 2015-2016*. Retrieved from [http://shelterprojects.org/shelterprojects2015-2016/ShelterProjects\\_2015-2016\\_lowres\\_web.pdf](http://shelterprojects.org/shelterprojects2015-2016/ShelterProjects_2015-2016_lowres_web.pdf)
- Hex House. (2018). Hex House - Rapidly Deployable House. Retrieved November 26, 2018, from <http://www.hex-house.com/>
- Howard, B. C. (2013). Behind the Viral Sensation: Concrete Canvas Goes Beyond Fast-Deploying Shelters. Retrieved December 16, 2018, from <https://blog.nationalgeographic.org/2013/03/20/behind-the-viral-sensation-concrete-canvas-goes-beyond-fast-deploying-shelters/>
- I-BEAM. (2018). The Pallet House. Retrieved December 16, 2018, from <http://www.i-beamdesign.com/new-york-humanitarian-projects-design/>
- IFRC. (2013). *Post-disaster shelter : Ten designs*. Geneva. Retrieved from [www.ifrc.org](http://www.ifrc.org)
- IFRC, UN-HABITAT, & UNHCR. (2013). *Shelter projects 2011-2012*.
- IFRC, UN-HABITAT, & UNHCR. (2014). *Shelter Projects 2013–2014*. Retrieved from <http://shelterprojects.org/shelterprojects2013-2014.html>
- Kessler, S. (2015). If Reaction Housing Wants to Provide Disaster Relief, It'll Have to Sh. Retrieved December 14, 2018, from <https://www.fastcompany.com/3042416/hotel-30>
- Lifeshelter. (2018). Lifeshelter - Innovative shelter solutions for refugees. Retrieved December 16, 2018, from <https://www.lifeshelter.com/family/>
- Maxey, K. (2013). Shelter Assembly in 25 Minutes. No Tools Required. Retrieved December 2, 2018, from <https://www.engineering.com/3DPrinting/3DPrintingArticles/ArticleID/5606/Shelter-Assembly-in-25-Minutes-No-Tools-Required.aspx>
- McDaniel, M. (2017). Where can I buy an Exo housing unit? — Michael McDaniel. Retrieved December 14, 2018, from <http://michaelmcdaniel.com/blog/2017/11/18/where-can-i-buy-an-exo-housing-unit>
- McKnight, J. (2016). Architects for Society creates low-cost hexagon refugee houses. Retrieved November 26, 2018, from <https://www.dezeen.com/2016/04/14/architects-for-society-low-cost-hexagonal-shelter-housing-refugees-crisis->

humanitarian-architecture/

- Meinhold, Bridgette. (2011). The Liina Transitional Modular Shelter Needs No Tools for Assembly. Retrieved December 16, 2018, from <https://inhabitat.com/the-liina-transitional-modular-shelter-needs-no-tools-for-assembly/>
- Real Relief. (2018). Lifeshelter. Retrieved December 16, 2018, from <http://www.realreliefway.com/en-us/life-saving-products/habitat/lifeshelter@/shelters>
- Treggiden, K. (2015). Designnobis proposes pop-up disaster relief shelter for earthquake-affected families. Retrieved November 26, 2018, from <https://www.dezeen.com/2015/08/23/designnobis-pop-up-temporary-disaster-relief-shelter-earthquakes-tentative/>
- UN-HABITAT, & IFRC. (2010). *Shelter projects 2009*. Retrieved from [www.ifrc.org](http://www.ifrc.org)
- UNHCR. (2016). *Shelter Design Catalogue*. Geneva.
- VisibleGood. (2018). Shelter: The RDM. Retrieved November 26, 2018, from <http://visible-good.com/shelters/>
- Williams, A. (2013). "Rapid Deployment Module" shelter assembles in 25 minutes, no tools required. Retrieved December 16, 2018, from <https://newatlas.com/rapid-deployment-module/27077/>
- World Shelters. (2018). World Shelters- Transhel. Retrieved December 16, 2018, from <http://worldshelters.org/shelters/transitional-shelter>
- World Shelters. (2009). *U-Dome 200*. Arcata- USA. Retrieved from [www.engreview.com](http://www.engreview.com)
- World Shelters. (2018a). *Transitional Shelter: Localizations to Recovery*. Retrieved from [www.worldshelters.org/info@worldshelters.org](http://www.worldshelters.org/info@worldshelters.org)
- World Shelters. (2018b). World Shelters- U-Dome. Retrieved December 15, 2018, from <http://worldshelters.org/shelters>
